# Supplementary material for: Analysis of Sporulation in Bacillus cereus Biovar anthracis Which Contains an Insertion in the Gene for the Sporulation Factor σK
Source: MDPI journal article supplement (doi:10.3390/pathogens12121442), 2023-12-13
Supplement: s1 [file s1]

**Analysis of sporulation in *Bacillus cereus* biovar *anthracis* which contains an insertion in the gene for the sporulation factor  $\sigma^K$**

**Supplementary Materials**

### *Bcbva sigK* gene with insertion (22925 bp):

**TTGAGTCTATTTCGCCGCAATTGG**ATATATGGTTCGAGAAGTGTGTTGTCTTTGTTTCTTATGTGAAGAACAATGCGTTTCCGCAGCCATTATCAT  
CAGACGATGAGAGAAAGTACTTAGAGTTAATGGAGCAAGGTGATGCTCAAGCGAGGAATCTGTTAATTGAACATAAATTACGGCTTGTAGCTCA  
TATC**GTAAAG**AGATTGTGTACTCAAAACGATGTCATGGACAAGGGTATCTAATGTACCATTATTTTAATATTCACTTGCTCTTCCCCATCAAA  
CTCTAAATGAATTCATCAATTAGCTGAGTAATAATATTTCTTTTCTGCAAGGTTAATTTATATCAGTCTTATCTTTAATACATTTTGA  
ATGGATTCAATAATTTGATCCATTCTTTTTTTGTGTTTTCTTTTGTCTTAAATTTATTT**GTCTTGAATGCTTGTAAATCT**CTTTTA  
ATTTACTTATTTGTTCATTTATT\_21479bp\_TTTTTCTATCTCAGTCTCATCATATATTT**CTCTAACTAATCGATAATGCGC**TCCCATTAAT  
TTTCTCCCCCTAGTATATATTTAAGTCATTTACTTGCTAATTATTCATTATCTCAAAAAAGGTTTTTTTTGGATACAATTTCTTTATTTGTTA  
ATGGAATAAAAAACGAGCGATTTAAAAATAGCTTATTTATGTAGTCCAGAACCTCAAAATGATTAAGTAGGAATAAATTTTCGGTATCCCC  
CACTAAAGGTGTGTTACCTTTAGTGGGGTAATTGAAGTTTGCCGATTTAATAAAGATATAATTTGTAATTTTTTGTATCAATTATCTTTT  
CTGTTGCTTTGTATTTCTTACCAGTGTAACCAGCATAAATTAGGATGTTAATAAGGATATTTTGACGTTCTTTTGTGTTTCATAAC**GTCAAA**  
AATTTGAAATACAGGGGAAGATGCAGAAGATTTAATTTCAATTGGTACAATCGGGCTCATTAAAGCGATTGAGAGCTATTCCGCAGGAAAAGG  
TACAAAACCTTGCAGCTACGCAGCACGCTGTATTGAAATGAAATTTTGATGCATTTACGTGTATTAAAGAAAACGAAAAGGACGTTTCACTT  
CATGATCCAATCGGGCAAGATAAAGAGGGGAATGAAATATCGCTTATTGATATATTAATAACAGAGTCTGAAGATGTAATTGATATGATCCAGC  
TTAGTATGGAGTTAGAAAAGATTAAAGAGTATATCGATATTTTAGACGAACGAGAGAAAAGAAGTAATCGTGAAGCGTTTTGGACTGGGGCTTGA  
TAAGGAGAAAACGCAACGAGAGATTGCGAAGGCACTTGGTATTTCCAGAAGCTATGTATCAAGAATTGAAAAGCGCGCTTAAATGAAAATGTTT  
CATGAATTTGTAAG**GCAGAGAAAGAGAAAAAGCAAAAGAATAA**

### Intact *sigK* gene after excision of insertion (714 bp):

**TTGAGTCTATTTCGCCGCAATTGG**ATATATGGTTCGAGAAGTGTGTTGTCTTTGTTTCTTATGTGAAGAACAATGCGTTTCCGCAGCCATTATCAT  
CAGACGATGAGAGAAAGTACTTAGAGTTAATGGAGCAAGGTGATGCTCAAGCGAGGAATCTGTTAATTGAACATAAATTACGGCTTGTAGCTCA  
TATC**GTAA**AAATTTGAAATACAGGGGAAGATGCAGAAGATTTAATTTCAATTGGTACAATCGGGCTCATTAAAGCGATTGAGAGCTATTTCG  
GCAGGAAAAGGTACAAAACCTTGCAGCTACGCAGCACGCTGTATTGAAATGAAATTTTGATGCATTTACGTGTATTAAAGAAAACGAAAAGG  
ACGTTTCACTTTCATGATCCAATCGGGCAAGATAAAGAGGGGAATGAAATATCGCTTATTGATATATTAATAACAGAGTCTGAAGATGTAATTGA  
TATGATCCAGCTTAGTATGGAGTTAGAAAAGATTAAAGAGTATATCGATATTTTAGACGAACGAGAGAAAAGAAGTAATCGTGAAGCGTTTTGGA  
CTGGGGCTTGATAAGGAGAAAACGCAACGAGAGATTGCGAAGGCACTTGGTATTTCCAGAAGCTATGTATCAAGAATTGAAAAGCGCGCTTAA  
TGAAAATGTTCCATGAATTTGTAAG**GCAGAGAAAGAGAAAAAGCAAAAGAATAA**

### Circularized insertion after excision (22211 bp):

21479bp\_AATAAATGAACAAATAAGTAAATTAAGA**AGAATTACAAGCATTCCAAGAC**AAAAATAAATTTAGAAAACAAAAAGGAAAACACAA  
AAAAAGAATGGATCAAAATATTGAATCCATTCAAAATGTATTAAGATAAGACTGATAATAAATTAACCTTTGCAGAAAAAGAAATATTAT  
TACTCAGCTAATTGATGAAATTCATTTAGAGTTTGATGGGGAAGAGCAAGTGAATATTAATAAATGGTACATTAGATACCTTGTCCAT**GAC**  
**ATCGTTTTGAGTACACAATCTCTTGAC**GTTATGAACACAAAAGACGTCAAAATATCCTTATTAACATCCTAATTTATGCTGGTTTTACTG  
TAAGAAATACAAAGCAACAGAAAAGATAATTGATCAAAAAAATTACAAATTATATCTTTATTAATAATCGGACAACTTCAATTACCCCCACTA  
AAGGTAACACACCTTTAGTGGGGGATACCGAAAATTTATCCTACTTAATCATTTTGTAGGTTCTGGACTACATAAATAAGCTATTTTTAAATC  
GCTCGTTTTTTTATTTCCATTAACAAATAAAGAAATTGTATCCAAAAAAACCTTTTTTGAGATAATTGAATAATTAGCAAGTAAATGACTTAA  
ATATATACTAGGGGAGAAAATTAATGGGAG**GCGCATTATCGATTAGTTAGAA**GAATATATGATGAGACTGAGATAGAAAAA

**Figure S1.** Sequence of the *Bcbva sigK* gene before and after excision of the insertion. Primers sigK-  
for and sigK-rev are indicated in bold, primers sigK-3 and sigK-4 in blue, and bases at the  
recombination site in red and green. The 16-bp imperfect inverted repeats are underlined.

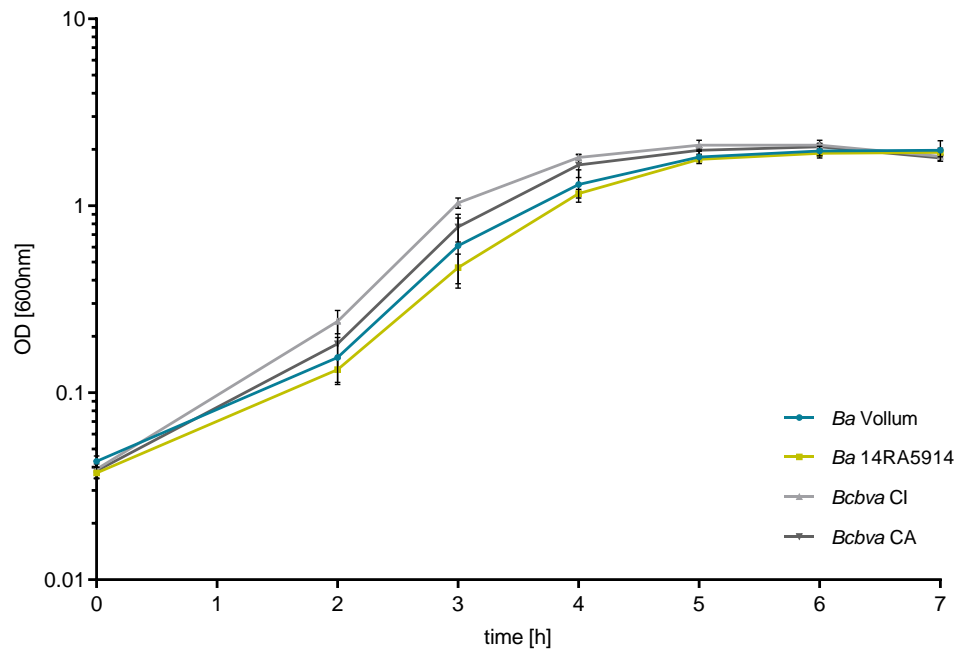

**Figure S2.** Growth curves of *Ba* and *Bcbva* strains in sporulation medium MGM. Averages and standard errors based on 3 independent replicates were calculated using the GraphPad Prism 9 Software.

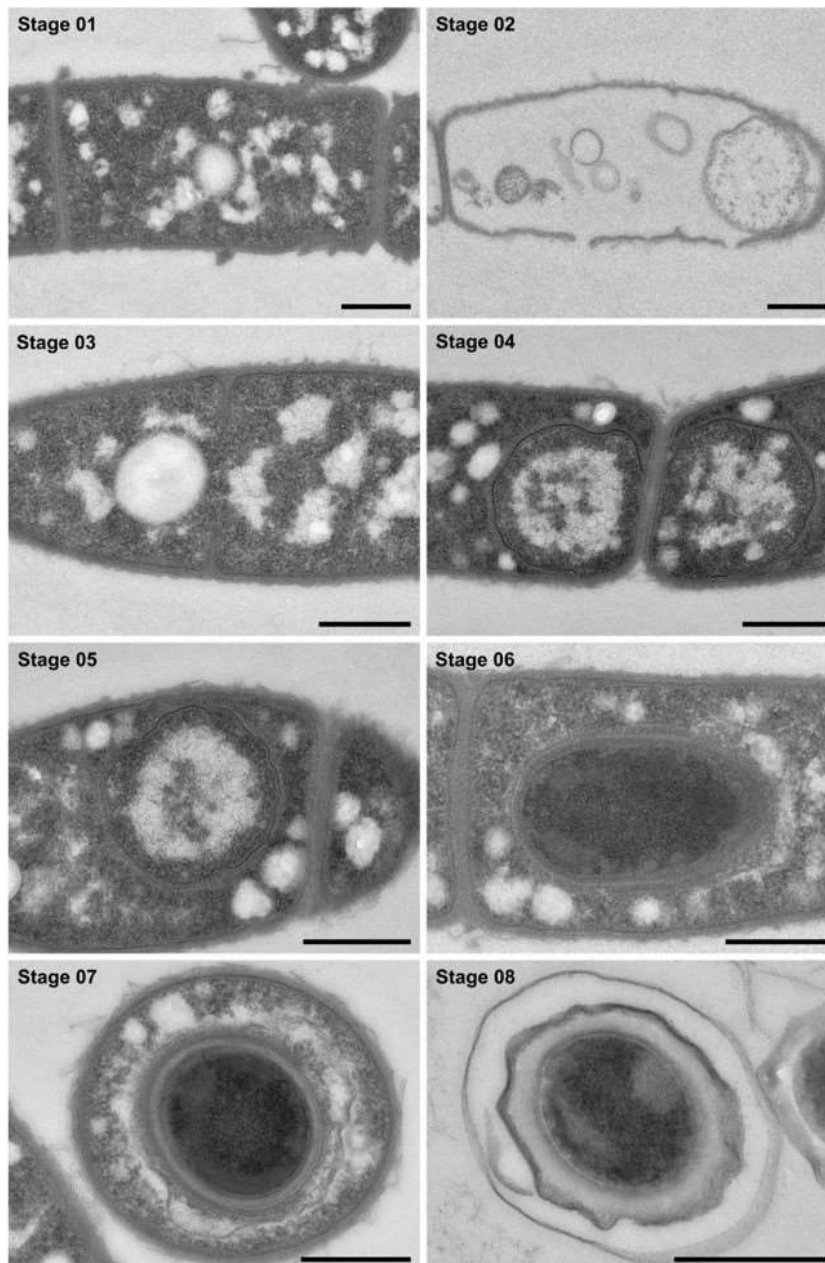

**Figure S3.** Sporulation stages of *Ba* 14RA5914 illustrated by transmission electron microscopy (TEM). Stage 1, vegetative cell; stage 2, lytic cell; stage 3, dividing cell; stage 4, beginning of engulfment; stage 5, end of engulfment; stage 6, end of engulfment and beginning of spore differentiation; stage 7, differentiated intracellular spore; stage 8, extracellular spore. Bars represent 500 nm.

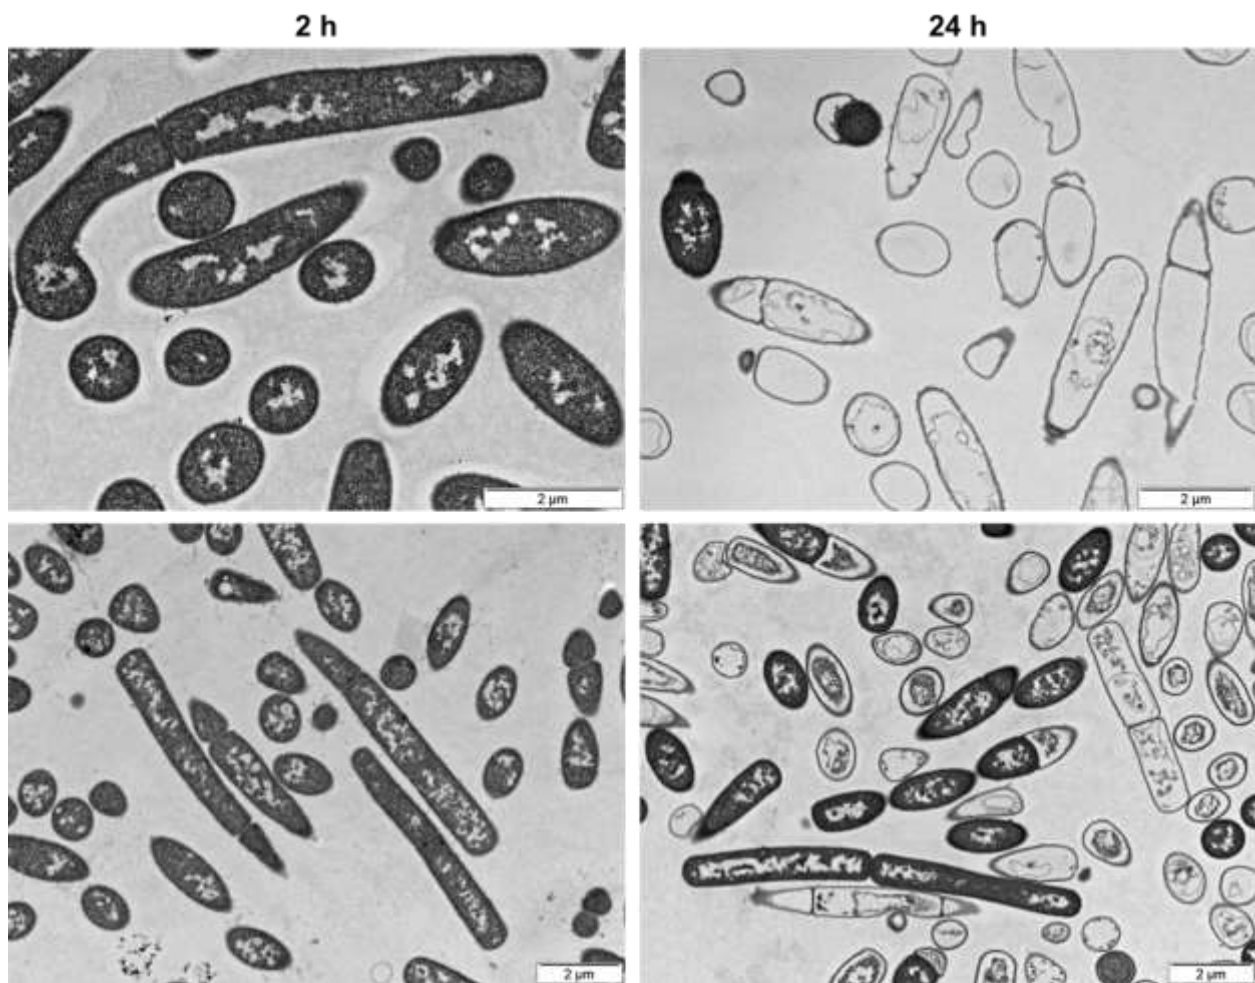

**Figure S4.** Representative TEM images of sections from *Bcbva* CI-12 (upper panel) and CA-2 (lower panel) grown for 2 or 24 hours in sporulation medium MGM. At 2 h of incubation in MGM bacteria reveal the typical ultrastructure of vegetative bacteria. After 24 h of incubation in MGM most cells appear extracted or show a condensed cytoplasm, but no spores or stages of sporulation.

**A**

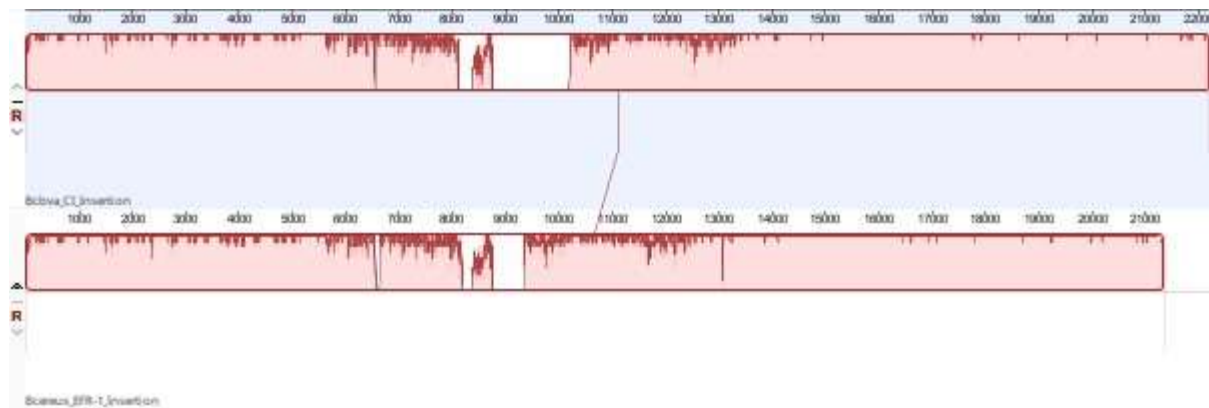

**B**

***B. cereus* biovar *anthracis***

sigK, 5': TTG ... AACATAATTTACGGCTTGTAGCTCATATCGTTAAGAGATTGTGTACTCAAAACGATGTCATGGA ...  
 sigK, 3': ... ATATTTTGACGTTCCTTTGTGTTCATAACGTCAAAAAATTGAAAATACAGGGGAAGATGCAGA ... TAA  
 intact gene: TTG ... AACATAATTTACGGCTTGTAGCTCATATCGTTAAAAAATTGAAAATACAGGGGAAGATGCAGA ... TAA

***B. paranthracis* EFR-4 and *B. cereus* EFR-1**

sigK, 5': TTG ... AACATAATTTACGGCTTGTAGCTCATATCGTTAAGAGATTGTGTACTCAAAACGATGTCATGGG ...  
 sigK, 3': ... ATATTTTGACGTTCCTTTGTGTTCATAACGTCAAAAAATTGAAAATACAGGGGAAGATGCAGA ... TAA  
 intact gene: TTG ... AACATAATTTACGGCTTGTAGCTCATATCGTTAAAAAATTGAAAATACAGGGGAAGATGCAGA ... TAA

***B. cereus* AH820**

sigK, 5': TTG ... ATGATCCAATCGGGCAAGATAAAGAGGGGAATGAGATGCCGACTAGACTTTATCCTGTTTAGAAA ...  
 sigK, 3': ... TGAATAAACAGGATAAAGTCTAGTGGGGAAATGAAATATCGCTTATTGATATATTTAAATCAGAG ... TAA  
 intact gene: TTG ... ATGATCCAATCGGGCAAGATAAAGAGGGGAATGAAATATCGCTTATTGATATATTTAAATCAGAG ... TAA

***B. cereus* J7 and *B. cereus* J62**

sigK, 5': TTG ... ATGATCCAATCGGGCAAGATAAAGAGGGGAATGAGTTACCAACTAGACTTTATCCTGTTTCTTAT ...  
 sigK, 3': ... GAGATACACAGGATAAAGTCTAGTGGGGAAATGAAATATCGCTTATTGATATATTTAAATCAGAG ... TAA  
 intact gene: TTG ... ATGATCCAATCGGGCAAGATAAAGAGGGGAATGAAATATCGCTTATTGATATATTTAAATCAGAG ... TAA

***B. subtilis***

sigK, 5': GTG ... GCGACGTATGCAGCGAGGTGTATTGAAATGAGATTGTAATTACAAAAGGGGGTGCATACA ...  
 sigK, 3': ... TTTATGCCCCCTTTTGTGAATGAATGAAATCCTCATGCATTTGCGCGCATTGAAAAA ... TAA  
 intact gene: GTG ... GCGACGTATGCAGCGAGGTGTATTGAAATGAAATCCTCATGCATTTGCGCGCATTGAAAAA ... TAA

C

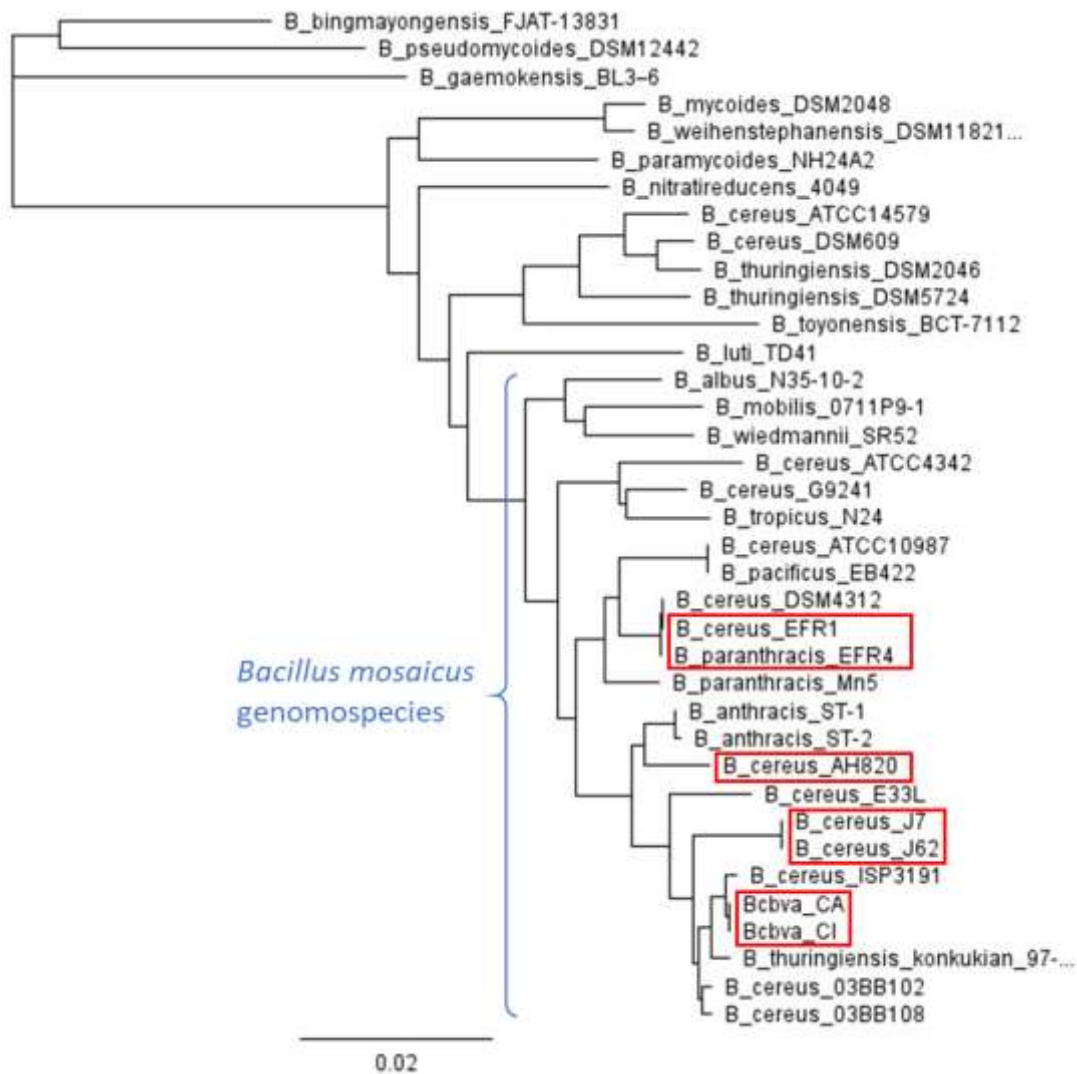

**Figure S5.** Strains possessing insertions in the *sigK* gene and comparison of corresponding sequences.

A: Mauve alignment (created in Geneious version 2021.2) of the *sigK* insertions of *Bcbva* CI (upper graph) and *B. cereus* EFR-1 (lower graph) indicating homologous and unique sequences.

B: Comparison of the insertion sites in *Bcbva*, further strains of the *B. cereus* group, and *B. subtilis*. A 18 bp imperfectly repeated sequence within which the recombination takes place in *Bcbva* and *B. paranthracis* EFR4/*B. cereus* EFR1 is highlighted in grey. The AATGA sequence at the recombination site (if present) is indicated in bold, inverted repeats are underlined.

C: Neighbor-Joining tree (created in Geneious version 2021.2) based on the concatenated sequences of the seven housekeeping genes *glp*, *gmk*, *ilv*, *pta*, *pur*, *pyc*, *tpi* (<https://pubmlst.org/organisms/bacillus-cereus>). Strains containing insertions in the *sigK* gene are members of the *Bacillus mosaicus* genomospecies and belong to sequence types ST 26 (*B. cereus* EFR-1 and *B. paranthracis* EFR-4), ST 460 (*B. cereus* AH820), ST 167 (*B. cereus* J7 and J62) and ST 935 (*Bcbva* CI and CA).

**Table S1.** Primer sequences.

| Primer     | Sequences in 5'-3' direction   |
|------------|--------------------------------|
| rpoB-for   | CGGCAGCGACAGCTTGTATT           |
| rpoB-rev   | AACCGCCTGACGTTGCA              |
| sigK-for   | TTGAGTCTATTGCGCCGAATTGG        |
| sigK-rev   | TTATTCTTTTGCTTTTTTCTCTTTCTCTGC |
| sigK-3     | AGAATTACAAGCATTCCAAGAC         |
| sigK-4     | TTCTAACTAATCGATAATGCGC         |
| sigK-rev2* | TCATCGTCTGATGATAATGGC          |
| sigG-for   | GCAAAGTGGAGAGATAAGCG           |
| sigG-rev   | CATAAGTCCGATACAACCAAC          |
| spoIID-for | GTGCACGATTACATCAAAGAG          |
| spoIID-rev | GTTCTGTAAATCTTTATGGACTG        |
| spoVG-for  | GCCTCTATTACTCTAGACCATGAA       |
| spoVG-rev  | GTGCAATGTCACGGAATTCTCC         |
| cotZ-for   | CACCATGGCTCTTCTCATTG           |
| cotZ-rev   | CTGATGCAGTATTGTGTGCG           |
| sigF-for   | AGAAACCTCAGTTAAAGGACC          |
| sigF-rev   | TGTACAACCGACCATACGAG           |
| sasP-for   | ACCAGGAGCAACAGCTGCAA           |
| sasP-rev   | ACCAGGAGCAACAGCTGCAA           |
| murF-for   | GGAATGTCAAGCCGCGGAGA           |
| murF-rev   | GCCTCACGAGAGCCTAAGTCC          |

\* reverse primer for expression analysis



**Table S2.** Open reading frames in the insertion of *Bcbva* CI and their homologies with the related insertion of *B. paranthracis* EFR-4 and *B. cereus* EFR-1.

| Locus Tag in <i>Bcbva</i> CI | Annotation                                                         | Protein size in <i>Bcbva</i> CI | Locus Tag and protein size in <i>B. paranthracis</i> EFR-4 / <i>B. cereus</i> EFR-1 | Identity at protein level             |
|------------------------------|--------------------------------------------------------------------|---------------------------------|-------------------------------------------------------------------------------------|---------------------------------------|
| not annotated                | <i>sigK</i> gene, 5'-end (encoding 65 aa up to recombination site) | 79 aa                           | INR14_21740 / INQ58_21740, 79 aa                                                    | 78/79 aa, 99% (first 65 aa identical) |
| BACI_c43240                  | recombinase family protein                                         | 545 aa                          | INR14_21735 / INQ58_21735, 545 aa                                                   | 534/545 aa, 98%                       |
| BACI_c43230                  | helix-turn-helix domain-containing protein                         | 148 aa                          | INR14_21730 / INQ58_21730, 148 aa                                                   | 145/148 aa, 98%                       |
| BACI_c43220                  | hypothetical protein                                               | 160 aa                          | INR14_21725 / INQ58_21725, 169 aa                                                   | 157/160 aa, 98%                       |
| BACI_c43210                  | recombinase family protein                                         | 532 aa                          | INR14_21720 / INQ58_21720, 532 aa                                                   | 524/532 aa, 98%                       |
| BACI_c43200                  | hypothetical protein                                               | 57 aa                           | INR14_21715 / INQ58_21715, 57 aa                                                    | 100%                                  |
| BACI_c43190                  | helix-turn-helix transcriptional regulator                         | 70 aa                           | INR14_21710 / INQ58_21710, 70 aa                                                    | 100%                                  |
| BACI_c43180                  | hypothetical protein                                               | 124 aa                          | INR14_21705 / INQ58_21705, 124 aa                                                   | 120/124 aa, 97%                       |
| BACI_c43170                  | putative endonuclease                                              | 182 aa                          | INR14_21700 / INQ58_21700, 182 aa                                                   | 170/182 aa, 94%                       |
| BACI_c43160                  | type I restriction-modification system subunit M*                  | 484 aa                          | INR14_21695 / INQ58_21695, 484 aa                                                   | 437/466 aa, 94%                       |
| BACI_c43150                  | type I restriction modification enzyme subunit S                   | 369 aa                          | INR14_21690 / INQ58_21690, 382 aa                                                   | 98/328 aa, 30%                        |
| BACI_c43140                  | hypothetical protein                                               | 222 aa                          | absent                                                                              |                                       |
| BACI_c43130                  | type I restriction-modification endonuclease, subunit R*           | 1113 aa                         | INR14_21685 / INQ58_21685, 1113 aa                                                  | 1075/1113 aa, 97%                     |
| BACI_c43120                  | hypothetical protein                                               | 83 aa                           | INR14_21680 / INQ58_21680, 83 aa                                                    | 100%                                  |
| BACI_c43110                  | dsDNA nuclease domain-containing protein*                          | 616 aa                          | INR14_21675 / INQ58_21675, 616 aa                                                   | 100%                                  |
| BACI_c43100                  | hypothetical protein                                               | 41 aa                           | INR14_21670 / INQ58_21670, 203 aa                                                   | 100%                                  |
| BACI_c43090                  | SMC family ATPase*                                                 | 1001 aa                         | INR14_21665 / INQ58_21665, 1001 aa                                                  | 1000/1001 aa, 99%                     |
| BACI_c43080                  | hypothetical protein                                               | 265 aa                          | INR14_21660 / INQ58_21660, 273 aa                                                   | 263/265 aa, 99%                       |
| BACI_c43070                  | sigma factor $\sigma^K$ ( <i>sigK</i> gene, 3'-end)                | 181 aa                          | INR14_21655 / INQ58_21655, 181 aa                                                   | 100%                                  |

aa, amino acids

\*frequent genes, also present in other strains of the *B. cereus* group

**Table S3.** Amplicon sizes and PCR efficiencies of the PCRs used for expression analysis.

| PCR assay | Amplicon size (bp) | PCR efficiency   |                    |                 |                 |
|-----------|--------------------|------------------|--------------------|-----------------|-----------------|
|           |                    | <i>Ba</i> Vollum | <i>Ba</i> 14RA5914 | <i>Bcbva</i> CI | <i>Bcbva</i> CA |
| sigK      | 104                | 1.9420           | 1.9396             | 1.9503          | 1.9195          |
| sigG      | 136                | 1.9200           | 1.9685             | 1.9530          | 1.9605          |
| spoIID    | 130                | 1.9130           | 2.0440             | 1.9495          | 1.9490          |
| spoVG     | 124                | 1.9698           | 1.9430             | 1.9796          | 1.9460          |
| cotZ      | 127                | 1.9286           | 1.9651             | 1.9640          | 1.9451          |
| sigF      | 121                | 1.9475           | 1.9833             | 1.9575          | 1.9599          |
| sasP      | 112                | 1.9252           | 1.9416             | 1.9584          | 1.9419          |
| murF      | 113                | 1.9215           | 1.9489             | 1.9517          | 1.9491          |
| rpoB      | 86                 | 1.9380           | 1.9448             | 1.9383          | 1.9370          |

**Table S4.** Colony forming units of heat-inactivated (65°C, 30 min) and untreated cultures of *Bcbva* CI wildtype and CI-12 revertant after 24 hours in MGM. Three replicates of each strain were tested.

| Strain                               |           | cfu/ml            | sporulation efficiency |
|--------------------------------------|-----------|-------------------|------------------------|
| <i>Bcbva</i> CI, rep. 1              | untreated | $1.6 \times 10^8$ | 100%                   |
|                                      | heat      | $2.1 \times 10^8$ |                        |
| <i>Bcbva</i> CI, rep. 2              | untreated | $7.9 \times 10^7$ | 100%                   |
|                                      | heat      | $1.6 \times 10^8$ |                        |
| <i>Bcbva</i> CI, rep. 3              | untreated | $1.5 \times 10^8$ | 93.3%                  |
|                                      | heat      | $1.4 \times 10^8$ |                        |
| <i>Bcbva</i> CI-12 revertant, rep. 1 | untreated | $7.6 \times 10^7$ | 93.4%                  |
|                                      | heat      | $7.1 \times 10^7$ |                        |
| <i>Bcbva</i> CI-12 revertant, rep. 2 | untreated | $1.1 \times 10^8$ | 84.5%                  |
|                                      | heat      | $9.3 \times 10^7$ |                        |
| <i>Bcbva</i> CI-12 revertant, rep. 3 | untreated | $7.8 \times 10^7$ | 100%                   |
|                                      | heat      | $8.7 \times 10^7$ |                        |

rep., replicate

cfu, colony forming units

**Table S5.** Quantification of frequency of sporulation stages.

| Growth<br>[h]                      | Number/percentage of <i>Ba</i> 14RA5914 cells in stage |      |     |      |      |      |     |     |       |
|------------------------------------|--------------------------------------------------------|------|-----|------|------|------|-----|-----|-------|
|                                    | 1                                                      | 2    | 3   | 4    | 5    | 6    | 7   | 8   | Total |
| <b>2</b>                           | 193                                                    | 1    | 6   | 0    | 0    | 0    | 1   | 0   | 201   |
|                                    | 96.0                                                   | 0.5  | 3.0 | 0.0  | 0.0  | 0.0  | 0.5 | 0.0 | 100   |
| <b>4</b>                           | 141                                                    | 1    | 10  | 0    | 0    | 0    | 0   | 0   | 152   |
|                                    | 92.8                                                   | 0.5  | 6.8 | 0.0  | 0.0  | 0.0  | 0.0 | 0.0 | 100   |
| <b>5</b><br><b>(t<sub>0</sub>)</b> | 201                                                    | 2    | 11  | 0    | 0    | 0    | 0   | 0   | 214   |
|                                    | 93.9                                                   | 0.9  | 5.1 | 0.0  | 0.0  | 0.0  | 0.0 | 0.0 | 100   |
| <b>6</b><br><b>(t<sub>1</sub>)</b> | 156                                                    | 1    | 12  | 88   | 1    | 0    | 0   | 0   | 258   |
|                                    | 60.5                                                   | 0.4  | 4.7 | 34.1 | 0.4  | 0.0  | 0.0 | 0.0 | 100   |
| <b>7</b><br><b>(t<sub>2</sub>)</b> | 116                                                    | 9    | 6   | 11   | 47   | 28   | 0   | 0   | 217   |
|                                    | 53.5                                                   | 4.1  | 2.8 | 5.1  | 21.7 | 12.9 | 0.0 | 0.0 | 100   |
| <b>8</b>                           | 99                                                     | 13   | 5   | 4    | 54   | 54   | 1   | 0   | 230   |
|                                    | 43.0                                                   | 5.7  | 2.2 | 1.7  | 23.5 | 23.5 | 0.4 | 0.0 | 100   |
| <b>9</b>                           | 98                                                     | 20   | 4   | 0    | 20   | 97   | 7   | 0   | 246   |
|                                    | 39.8                                                   | 8.1  | 1.6 | 0.0  | 8.1  | 39.4 | 2.8 | 0.0 | 100   |
|                                    |                                                        |      |     |      |      |      |     |     |       |
| Growth<br>[h]                      | Number/percentage of <i>Bcbva</i> CI cells in stage    |      |     |      |      |      |     |     |       |
|                                    | 1                                                      | 2    | 3   | 4    | 5    | 6    | 7   | 8   | Total |
| <b>2</b>                           | 234                                                    | 1    | 8   | 0    | 0    | 0    | 0   | 0   | 243   |
|                                    | 96.3                                                   | 0.4  | 3.3 | 0.0  | 0.0  | 0.0  | 0.0 | 0.0 | 100   |
| <b>4</b><br><b>(t<sub>0</sub>)</b> | 246                                                    | 1    | 6   | 0    | 0    | 0    | 0   | 0   | 253   |
|                                    | 97.2                                                   | 0.4  | 2.4 | 0.0  | 0.0  | 0.0  | 0.0 | 0.0 | 100   |
| <b>5</b><br><b>(t<sub>1</sub>)</b> | 231                                                    | 20   | 8   | 13   | 0    | 0    | 0   | 0   | 272   |
|                                    | 84.9                                                   | 7.4  | 2.9 | 4.8  | 0.0  | 0.0  | 0.0 | 0.0 | 100   |
| <b>6</b><br><b>(t<sub>2</sub>)</b> | 120                                                    | 48   | 1   | 14   | 50   | 7    | 0   | 0   | 240   |
|                                    | 50.0                                                   | 20.0 | 0.4 | 5.8  | 20.8 | 2.9  | 0.0 | 0.0 | 100   |
| <b>7</b>                           | 85                                                     | 61   | 4   | 0    | 58   | 30   | 0   | 0   | 238   |
|                                    | 35.7                                                   | 25.6 | 1.7 | 0.0  | 24.4 | 12.6 | 0.0 | 0.0 | 100   |
| <b>8</b>                           | 96                                                     | 57   | 1   | 0    | 31   | 54   | 2   | 0   | 241   |
|                                    | 39.8                                                   | 23.7 | 0.4 | 0.0  | 12.9 | 22.4 | 0.8 | 0.0 | 100   |
| <b>9</b>                           | 102                                                    | 61   | 1   | 0    | 4    | 64   | 23  | 0   | 255   |
|                                    | 40.0                                                   | 23.9 | 0.4 | 0.0  | 1.6  | 25.1 | 9.0 | 0.0 | 100   |
